# Supplementary material
Source: Hindawi journal article supplement (doi:10.1155/2011/467691)
Supplement: f1 [file 467691.f1.pdf]

**A**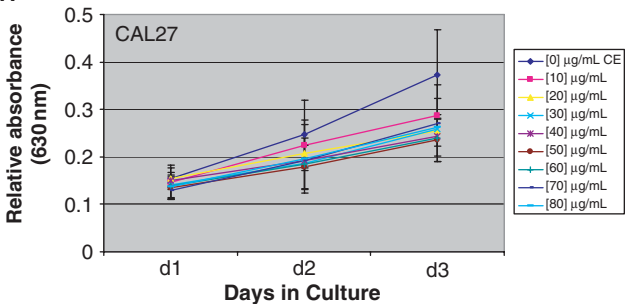**B**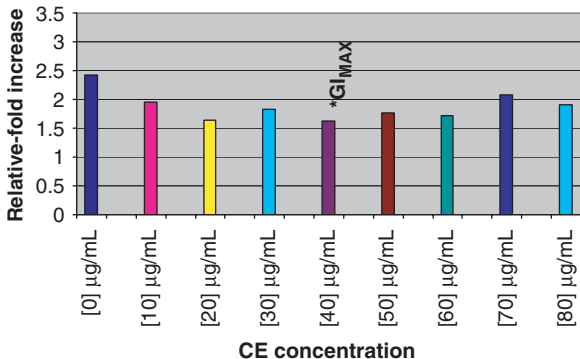**C**

| ANOVA   |                |     |             |       |      |
|---------|----------------|-----|-------------|-------|------|
|         | Sum of Squares | df  | Mean Square | F     | Sig. |
| Between | .456           | 8   | .029        | 5.999 | .000 |
| Within  | 1.284          | 279 | .005        |       |      |
| Total   | 1.740          | 287 |             |       |      |

  

| two-tailed <i>t</i> -test (p value) |                            |                            |
|-------------------------------------|----------------------------|----------------------------|
|                                     | +CE [10 $\mu\text{g/mL}$ ] | +CE [40 $\mu\text{g/mL}$ ] |
| CAL27                               | 0.005893                   | 0.000000                   |
