# Supplementary material
Source: Hindawi journal article supplement (doi:10.1155/2011/467691)
Supplement: f2 [file 467691.f2.pdf]

**A**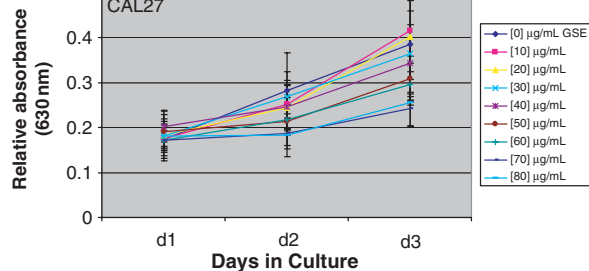**B**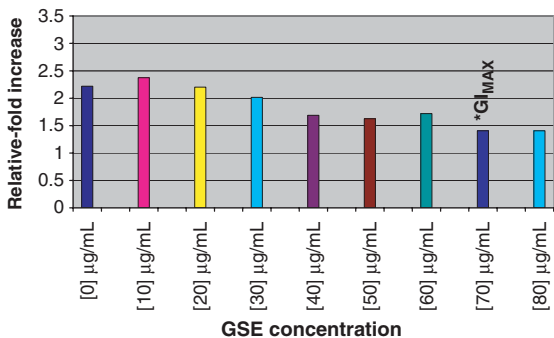**C**

| ANOVA                               |                 |                 |             |       |      |
|-------------------------------------|-----------------|-----------------|-------------|-------|------|
|                                     | Sum of Squares  | df              | Mean Square | F     | Sig. |
| Between                             | .515            | 8               | .064        | 8.552 | .000 |
| Within                              | 2.036           | 279             | .008        |       |      |
| Total                               | 3.064           | 287             |             |       |      |
| two-tailed <i>t</i> -test (p value) |                 |                 |             |       |      |
|                                     | +GSE [10 µg/mL] | +GSE [70 µg/mL] |             |       |      |
| CAL27                               | 0.5269          | 0.000000        |             |       |      |
