# Supplementary material
Source: Hindawi journal article supplement (doi:10.1155/2011/467691)
Supplement: f4 [file 467691.f4.pdf]

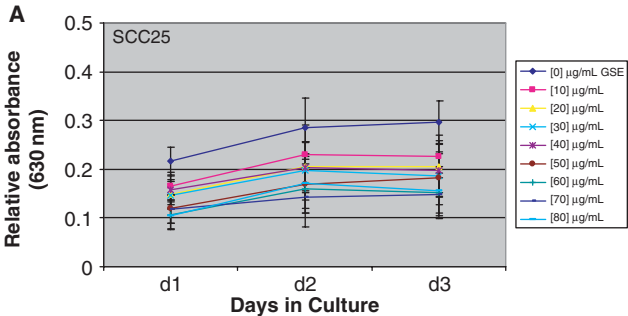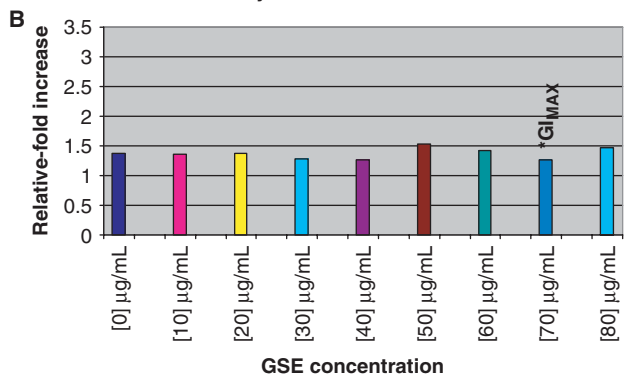

**C**

**ANOVA**

|         | Sum of Squares | df  | Mean Square | F      | Sig. |
|---------|----------------|-----|-------------|--------|------|
| Between | .573           | 8   | .072        | 14.542 | .000 |
| Within  | 1.375          | 279 | .005        |        |      |
| Total   | 1.949          | 287 |             |        |      |

**two-tailed *t*-test (p value)**

|       | +GSE [10 $\mu\text{g/mL}$ ] | +GSE [70 $\mu\text{g/mL}$ ] |
|-------|-----------------------------|-----------------------------|
| SCC25 | 0.005894                    | 0.000451                    |
