# Supplementary material
Source: Hindawi journal article supplement (doi:10.1155/2011/467691)

**+CE**

**+GSE**

**SCC25**

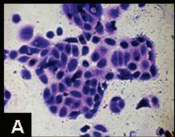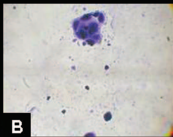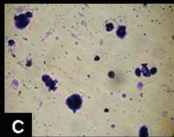

**SCC25**

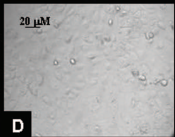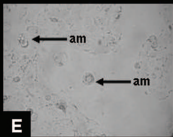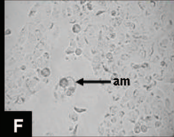

Supplement: f7 [file 467691.f7.pdf]
