# Supplementary material
Source: Hindawi journal article supplement (doi:10.1155/2011/467691)
Supplement: f8 [file 467691.f8.pdf]

SCC-25

+CE

+GSE

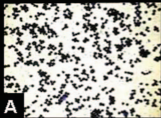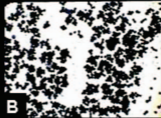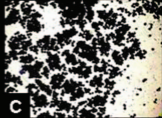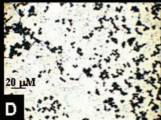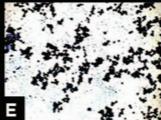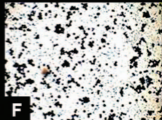

CAL27

20 μm
