# Supplementary material
Source: Hindawi journal article supplement (doi:10.1155/2011/467691)

**+CE**

**+GSE**

**CAL27**

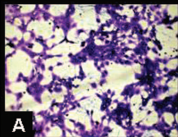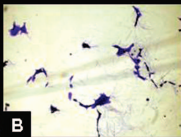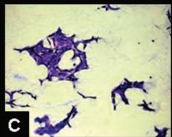

**CAL27**

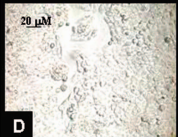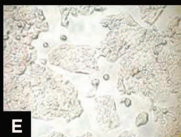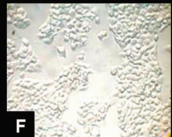

Supplement: f6 [file 467691.f6.pdf]
